# Supplementary material for: Identifying drug-drug interactions in spontaneous reports utilizing signal detection and biological plausibility aspects
Source: Research Square preprint supplement (doi:10.21203/rs.3.rs-3478903/v1), 2023-10-26
Supplement: Supplementary file 1 [file 209fb4602a89151a5b2003c1.xlsx]

## Sheet: Info
Appendix S1. Manually curated mapping list of free-text adverse event (AE) descriptions to MedDRA terms.
Note: This speadsheet contains a mapping table of HPO entities to MedDRA terms that were used in the standardisation process of the adverse event concepts. The mappings were derived from a mapping file that is available on the Human Phenotype Ontology (HPO) Github repository (https://github.com/obophenotype/human-phenotype-ontology/blob/master/src/mappings/medraMapping.tsv), by only considering m…

## Sheet: Appendix_S1
MedDRA_name	UMLS	HPO_code	HPO_name
Abdominal aortic aneurysm	C0162871	HP:0004953	Abdominal aortic aneurysm
Abdominal distension	C0000731	HP:0003270	Abdominal distention
Abdominal hernia	C0178282	HP:0004299	Hernia of the abdominal wall
Abdominal pain	C0000737	HP:0002027	Abdominal pain
Abnormal platelets	C0151854	HP:0001872	Abnormality of thrombocytes
Acanthosis nigricans	C0000889	HP:0000956	Acanthosis nigricans
Acne	C0702166	HP:0001061	Acne
Acrocyanosis	C0221347	HP:0001063	Acrocyanosis
Acute hepatic failure	C0162557	HP:0006554	Acute hepatic failure
Acute leukaemia	C0085669	HP:0002488	Acute leukemia
Acute lymphocytic leukaemia	C0023449	HP:0006721	Acute lymphatic leukemia
Acute myeloid leukaemia	C0023467	HP:0004808	Acute myeloid leukemia
Acute myocardial infarction	C0155626	HP:0001658	Myocardial infarction
Acute promyelocytic leukaemia	C0023487	HP:0004836	Acute promyelocytic leukemia
Acute pulmonary oedema	C0155919	HP:0100598	Pulmonary edema
Acute sinusitis	C0149512	HP:0000255	Acute sinusitis
Adrenal insufficiency	C0001623	HP:0000846	Adrenal insufficiency
Agoraphobia	C0001818	HP:0000756	Agoraphobia
Akinesia	C0085623	HP:0002304	Akinesia
Albumin low	C0860864	HP:0003073	Hypoalbuminemia
Alkalosis	C0002063	HP:0001948	Alkalosis
Alopecia	C0002170	HP:0001596	Alopecia
Amaurosis fugax	C0149793	HP:0100576	Amaurosis fugax
Amblyopia	C0002418	HP:0000646	Amblyopia
Amenorrhea secondary	C0232940	HP:0000869	Secondary amenorrhea
Amenorrhoea	C0002453	HP:0000141	Amenorrhea
Amyloidosis	C0002726	HP:0011034	Amyloidosis
Amyotrophic lateral sclerosis	C0002736	HP:0007354	Amyotrophic lateral sclerosis
Anaemia	C0002871	HP:0001903	Anemia
Anaemia haemolytic autoimmune	C0002880	HP:0001890	Autoimmune hemolytic anemia
Anaemia macrocytic	C0002886	HP:0001972	Macrocytic anemia
Anaemia megaloblastic	C0002888	HP:0001889	Megaloblastic anemia
Anal atresia	C0003466	HP:0002023	Anal atresia
Anal fistula	C0205929	HP:0010447	Anal fistula
Anencephaly	C0002902	HP:0002323	Anencephaly
Aneurysm	C0002940	HP:0002617	Aneurysm
Angina pectoris	C0002962	HP:0001681	Angina pectoris
Angioedema	C0002994	HP:0100665	Angioedema
Anophthalmos	C0003119	HP:0000528	Anophthalmia
Anorexia	C0003123	HP:0002039	Anorexia
Anuria	C0003460	HP:0100519	Anuria
Anus disorder	C0003462	HP:0004378	Abnormality of the anus
Anxiety	C0003467	HP:0000739	Anxiety
Aortic aneurysm	C0003486	HP:0004942	Aortic aneurysms
Aphasia	C0003537	HP:0002381	Aphasia
Aplastic anaemia	C0002874	HP:0001915	Aplastic anemia
Areflexia	C0234146	HP:0001284	Areflexia
Arrhythmia	C0003811	HP:0011675	Arrhythmia
Arrhythmia supraventricular	C0428974	HP:0005115	Supraventricular arrhythmia
Arterial thrombosis	C0151942	HP:0004420	Arterial thrombosis
Arthritis	C0003864	HP:0001369	Arthritis
Ascites	C0003962	HP:0001541	Ascites
Aseptic necrosis	C0085660	HP:0010885	Aseptic necrosis
Asthma	C0004096	HP:0002099	Asthma
Astrocytoma	C0004114	HP:0009592	Astrocytoma
Ataxia	C0004134	HP:0001251	Ataxia
Athetosis	C0004158	HP:0002305	Athetosis
Atrial septal defect	C0018817	HP:0001631	Defect in the atrial septum
Atrioventricular block	C0004245	HP:0001678	Atrioventricular block
Atrioventricular block first degree	C0085614	HP:0011705	First degree atrioventricular block
Atrioventricular block second degree	C0264906	HP:0011706	Second degree atrioventricular block
Atrioventricular dissociation	C0004331	HP:0011709	atrioventricular dissociation
Azoospermia	C0004509	HP:0000027	Azoospermia
Azotaemia	C0242528	HP:0002157	Azotemia
Bilirubin total increased	C0741494	HP:0003573	Increased total bilirubin
Bilirubin unconjugated increased	C0740435	HP:0008282	Unconjugated hyperbilirubinemia
Bladder carcinoma	C0699885	HP:0002862	Bladder carcinoma
Bladder distension	C0005687	HP:0010955	Dilatation of the bladder
Blepharospasm	C0005747	HP:0000643	Blepharospasm
Blindness	C0456909	HP:0000618	Blindness
Blood albumin decreased	C0853777	HP:0003073	Hypoalbuminemia
Blood alkaline phosphatase increased	C0852911	HP:0003155	Elevated alkaline phosphatase
Blood creatine phosphokinase increased	C0853034	HP:0003236	Elevated serum creatine phosphokinase
Blood creatinine increased	C0235431	HP:0003259	Increased creatinine
Blood glucose abnormal	C0580546	HP:0011015	Abnormality of blood glucose concentration
Blood glucose decreased	C0595883	HP:0001943	Hypoglycemia
Blood glucose increased	C0595877	HP:0003074	Hyperglycemia
Blood gonadotrophin decreased	C0853974	HP:0003335	Low gonadotropins
Blood growth hormone increased	C0853015	HP:0000845	Growth hormone excess
Blood immunoglobulin G decreased	C0853705	HP:0004313	Hypogammaglobulinemia
Blood insulin increased	C0852795	HP:0000842	Hyperinsulinemia
Blood iron increased	C0853784	HP:0003452	Increased serum iron
Blood magnesium decreased	C0853750	HP:0002917	Hypomagnesemia
Blood potassium decreased	C0853761	HP:0002900	Hypokaliemia
Blood potassium increased	C0853760	HP:0002513	Hyperkaliemia
Blood pressure diastolic increased	C0277889	HP:0005117	Elevated diastolic blood pressure
Blood pressure increased	C0497247	HP:0000822	Hypertension
Blood pressure systolic increased	C0277884	HP:0004421	Elevated systolic blood pressure
Blood prolactin increased	C0854082	HP:0000870	Hyperprolactinemia
Blood sodium increased	C0595878	HP:0003228	Hypernatremia
Blood thyroid stimulating hormone increased	C0853019	HP:0002925	Increased serum thyroid-stimulating hormone
Blood triglycerides increased	C0853692	HP:0002155	Hypertriglyceridemia
Blood uric acid increased	C0235416	HP:0002149	Hyperuricemia
Bone density decreased	C0877225	HP:0004349	Reduced bone mineral density
Bone sarcoma	C1704327	HP:0002669	Osteosarcoma
Bradycardia	C0428977	HP:0001662	Bradycardia
Bradykinesia	C0233565	HP:0002067	Bradykinesia
Bulimia	C0006370	HP:0100739	Bulimia
Ca++ increased	C0553702	HP:0003072	Hypercalcemia
Cachexia	C0006625	HP:0004326	Cachexia
Calcinosis	C0006663	HP:0003761	Calcinosis
Calcium low	C0860967	HP:0002901	Hypocalcemia
Calculus bladder	C0005683	HP:0010474	Bladder stones
Calculus of kidney	C0022650	HP:0000787	Nephrolithiasis
Cataplexy	C0007384	HP:0002524	Cataplexy
Cataract subcapsular	C0235259	HP:0000523	Subcapsular cataract
Central nervous system neoplasm	C0085136	HP:0100006	Neoplasm of the central nervous system
Central obesity	C0311277	HP:0001956	Truncal obesity
Central scotoma	C0152191	HP:0000603	Central scotoma
Cerebral atrophy	C0235946	HP:0002059	Cerebral atrophy
Cerebral haemorrhage	C2937358	HP:0001342	Cerebal hemorrhage
Cerebral ischaemia	C0917798	HP:0002637	Cerebral ischemia
Cerebral palsy	C0007789	HP:0100021	Cerebral palsy
Cerebral venous thrombosis	C0151945	HP:0005305	Cerebral venous thrombosis
Cerebrovascular accident	C0038454	HP:0001297	Stroke
Chalazion	C0007933	HP:0010605	Chalazion
Cholecystitis	C0008325	HP:0001082	Cholecystitis
Cholelithiasis	C0008350	HP:0001081	Cholelithiasis
Cholestasis	C0008370	HP:0001396	Cholestasis
Cholestasis intrahepatic	C0008372	HP:0001406	Intrahepatic cholestasis
Cholestatic liver disease	C0860204	HP:0002611	Cholestatic liver disease
Cholesterol serum elevated	C0595929	HP:0003124	Hypercholesterolemia
Choreoathetosis	C0085583	HP:0001266	Choreoathetosis
Chorioretinopathy	C0339383	HP:0001145	Chorioretinopathy
Chronic leukaemia	C1279296	HP:0005558	Chronic leukemia
Chronic obstructive pulmonary disease	C0024117	HP:0006510	Chronic obstructive pulmonary disease
Clonus	C0009024	HP:0002169	Clonus
Clumsiness	C0233844	HP:0002312	Clumsiness
Cogwheel rigidity	C0151564	HP:0002396	Cogwheel rigidity
Colitis	C0009319	HP:0002583	Colitis
Colon cancer	C0007102	HP:0003003	Colon cancer
Coma	C0009421	HP:0001259	Coma
Congenital diaphragmatic hernia	C0235833	HP:0000776	Congenital diaphragmatic hernia
Congenital megacolon	C0019569	HP:0002251	Aganglionic megacolon
Congenital neutropenia	C0340970	HP:0005549	Congenital neutropenia
Conjunctivitis	C0009763	HP:0000509	Conjunctivitis
Conjunctivitis allergic	C0009766	HP:0007879	Allergic conjunctivitis
Constipation	C0009806	HP:0002019	Constipation
Constricted pupils	C0728710	HP:0000616	Miosis
Cor pulmonale	C0034072	HP:0001648	Cor pulmonale
Corneal degeneration	C0155118	HP:0007705	Corneal degeneration
Coronary artery stenosis	C0242231	HP:0005145	Coronary artery stenosis
Creatine phosphokinase serum increased	C0241005	HP:0003236	Elevated serum creatine phosphokinase
Creatinine increased	C0151578	HP:0003259	Increased creatinine
Creatinine renal clearance decreased	C0151577	HP:0000120	Reduced creatinine clearance
Crohn's disease	C0010346	HP:0100280	Crohn's disease
Cyanosis	C0010520	HP:0000961	Cyanosis
Dacryocystitis	C0010930	HP:0000620	Dacrocystitis
Deafness neurosensory	C0018784	HP:0000407	Sensorineural hearing impairment
Delusion	C0011253	HP:0000746	Delusions
Dementia	C0497327	HP:0000726	Dementia
Dementia Alzheimer's type	C0002395	HP:0002511	Alzheimer disease
Diabetes insipidus	C0011848	HP:0000873	Diabetes insipidus
Diabetes mellitus	C0011849	HP:0000819	Diabetes mellitus
Diabetic ketoacidosis	C0011880	HP:0001953	Diabetic ketoacidosis
Diarrhoea	C0011991	HP:0002014	Diarrhea
Difficulty in micturition	C0241705	HP:0004424	Micturition difficulties
Diplopia	C0012569	HP:0000651	Diplopia
Discoid lupus erythematosus	C0024138	HP:0007417	Discoid lupus erythematosus
Disseminated intravascular coagulation	C0012739	HP:0005521	Disseminated intravascular coagulation
Drooling	C0013132	HP:0002307	Drooling
Drowsiness	C0013144	HP:0002329	Drowsiness
Dry mouth	C0043352	HP:0000217	Xerostomia
Dry skin	C0151908	HP:0000958	Dry skin
Duodenal ulcer	C0013295	HP:0002588	Duodenal ulcer
Dysautonomia	C0013363	HP:0002459	Dysautonomia
Dysdiadochokinesis	C0234979	HP:0002075	Dysdiadochokinesis
Dysgeusia	C0013378	HP:0000223	Abnormality of taste sensation
Dysgraphia	C0234144	HP:0010526	Dysgraphia
Dyskinesia	C0013384	HP:0100660	Dyskinesis
Dyslexia	C0476254	HP:0010522	Dyslexia
Dysmenorrhoea	C0013390	HP:0100607	Dysmenorrhea
Dysmetria	C0234162	HP:0001310	Dysmetria
Dysphagia	C0011168	HP:0002015	Dysphagia
Dysphasia	C0973461	HP:0002357	Dysphasia
Dysphonia	C1527344	HP:0001618	Dysphonia
Dyspnoea	C0013404	HP:0002094	Dyspnea
Dyspnoea exertional	C0231807	HP:0002875	Exertional dyspnea
Dyssomnia	C0700201	HP:0002360	Sleep disturbances
Dystonia	C0393593	HP:0001332	Dystonia
Dysuria	C0013428	HP:0100518	Dysuria
Echocardiogram abnormal	C0476369	HP:0003116	Abnormal echocardiogram
Echolalia	C0013528	HP:0010529	Echolalia
Eclampsia	C0013537	HP:0100601	Eclampsia
Ectropion	C0013592	HP:0000656	Ectropion
Eczema	C0013595	HP:0000964	Eczema
Edema cerebral	C0006114	HP:0002181	Cerebral edema
Electrocardiogram abnormal	C0522055	HP:0003115	Abnormal EKG
Electrocardiogram QT prolonged	C0151878	HP:0001657	Prolonged QT interval on EKG
Electroencephalogram abnormal	C0151611	HP:0002353	EEG abnormality
Emphysema	C0034067	HP:0002097	Emphysema
Encephalitis	C0014038	HP:0002383	Encephalitis
Endocardial fibrosis	C0235970	HP:0006685	Endocardial fibrosis
Enlarged clitoris	C0156394	HP:0000057	Clitoromegaly
Enterocolitis	C0014356	HP:0004387	Enterocolitis
Eosinophilia	C0014457	HP:0001880	Eosinophilia
Epididymitis	C0014534	HP:0000031	Epididymitis
Epilepsy	C0014544	HP:0001250	Seizures
Epiphyseal disorder	C0700136	HP:0005930	Abnormality of the epiphyses
Episcleritis	C0014583	HP:0100534	Episcleritis
Epistaxis	C0014591	HP:0000421	Epistaxis
Eruptive xanthoma	C0221252	HP:0001013	Eruptive xanthomas
Erysipelas	C0014733	HP:0001055	Erysipelas
Erythema	C0041834	HP:0010783	Erythema
Erythema facial	C0239488	HP:0001041	Facial erythema
Erythrocytosis	C1527405	HP:0001901	Polycythemia
Euthyroid goitre	C0302859	HP:0009798	Euthyroid goiter
Eye inflammation	C0239429	HP:0100533	Inflammatory abnormality of the eye
Eye movement disorder	C0028850	HP:0000496	Abnormality of eye movement
Eye pain	C0151827	HP:0200025	Ocular pain
Face oedema	C0542571	HP:0000282	Facial edema
Factor VIII deficiency	C0019069	HP:0003125	Factor VIII deficiency
Fibrosarcoma	C0016057	HP:0100244	Fibrosarcoma
Footdrop	C0085684	HP:0003377	Foot drop
Gait disturbance	C0575081	HP:0001288	Gait disturbance
Gait shuffling	C0231688	HP:0002362	Shuffling gait
Gastric ulcer	C0038358	HP:0002592	Gastric ulcer
Gastrointestinal carcinoma	C0151544	HP:0002672	Gastrointestinal carcinoma
Gastrointestinal haemorrhage	C0017181	HP:0002239	Gastrointestinal hemorrhage
Gastrointestinal obstruction	C0236124	HP:0004796	Gastrointestinal obstruction
Generalised oedema	C0151603	HP:0007430	Generalized edema
Genitourinary tract neoplasm	C0042065	HP:0007379	Genitourinary tract neoplasm
Gingival bleeding	C0017565	HP:0000225	Gingival bleeding
Gingivitis	C0017574	HP:0000230	Gingivitis
Glaucoma	C0017601	HP:0000501	Glaucoma
Glioma	C0017638	HP:0009733	Glioma
Glomerulonephritis	C0017658	HP:0000099	Glomerulonephritis
Glossitis	C0017675	HP:0000206	Glossitis
Glucose decreased	C1704381	HP:0001943	Hypoglycemia
Glucose increased	C0860803	HP:0003074	Hyperglycemia
Glucose low	C0860801	HP:0001943	Hypoglycemia
Glucose tolerance abnormal	C0235401	HP:0004924	Abnormal oral glucose tolerance
Glucose tolerance impaired	C0271650	HP:0000833	Glucose intolerance
Glycosuria	C0017979	HP:0003076	Glycosuria
Goitre	C0018021	HP:0000853	Goiter
Gout	C0018099	HP:0001997	Gout
Gynaecomastia	C0018418	HP:0000771	Gynecomastia
Haemangioma	C0018916	HP:0001028	Hemangiomas
Haemarthrosis	C0018924	HP:0005261	Joint hemorrhage
Haematemesis	C0018926	HP:0002248	Hematemesis
Haematochezia	C0018932	HP:0002573	Hematochezia
Haematocrit increased	C0239935	HP:0001899	Increased hematocrit
Haematological malignancy	C0376545	HP:0004377	Hematological neoplasia
Haematuria	C0018965	HP:0000790	Hematuria
Haemoglobin decreased	C0162119	HP:0003136	Decreased hemoglobin
Haemoglobin increased	C0549448	HP:0001900	Increased hemoglobin
Haemoglobinuria	C0019048	HP:0003641	Hemoglobinuria
Haemolytic anaemia	C0002878	HP:0001878	Hemolytic anemia
Haemolytic uraemic syndrome	C0019061	HP:0005575	Hemolytic-uremic syndrome
Haemoptysis	C0019079	HP:0002105	Hemoptysis
Haemorrhage intracranial	C0151699	HP:0002170	Intracranial hemorrhage
Hair disorder	C0018500	HP:0001595	Abnormality of the hair
Hair texture abnormal	C0235807	HP:0010719	Abnormality of hair texture
Hallucination, auditory	C0233762	HP:0008765	Auditory hallucinations
Head titubation	C1608410	HP:0002599	Head titubation
Headache	C0018681	HP:0002315	Headache
Hearing impaired	C1384666	HP:0000365	Hearing impairment
Hepatic cirrhosis	C0023890	HP:0001394	Cirrhosis
Hepatic enzyme increased	C0235996	HP:0002910	Elevated hepatic transaminases
Hepatic failure	C0085605	HP:0001399	Hepatic failure
Hepatic fibrosis	C0239946	HP:0001395	Hepatic fibrosis
Hepatic impairment	C0948807	HP:0001410	Decreased liver function
Hepatic necrosis	C0151798	HP:0002605	Hepatic necrosis
Hepatic neoplasm	C0023903	HP:0002896	Neoplasm of the liver
Hepatitis fulminant	C0302809	HP:0004787	Fulminant hepatitis
Hepatitis viral	C0042721	HP:0006562	Viral hepatitis
Hepatoblastoma	C0206624	HP:0002884	Hepatoblastoma
Hepatosplenomegaly	C0019214	HP:0001433	Hepatosplenomegaly
Hernia	C0019270	HP:0100790	Hernia
High cholesterol	C1522133	HP:0003124	Hypercholesterolemia
High density lipoprotein decreased	C0151691	HP:0003233	Decreased circulating high-density lipoprotein cholesterol
Hip dysplasia	C1328407	HP:0001385	Hip dysplasia
Hordeolum	C0019917	HP:0010606	Hordeolum
Hydrocephalus	C0020255	HP:0000238	Hydrocephalus
Hydrocortisone decreased	C0740379	HP:0008220	Hypocortisolemia
Hydronephrosis	C0020295	HP:0000126	Hydronephrosis
Hydrops foetalis	C0020305	HP:0001789	Hydrops fetalis
Hydroureter	C0521620	HP:0000072	Hydroureter
Hyperacusis	C0034880	HP:0010780	Hyperacusis
Hyperadrenocorticism	C0001622	HP:0001578	Hypercortisolism
Hyperbilirubinaemia	C0020433	HP:0002904	Hyperbilirubinemia
Hypercalcaemia	C0020437	HP:0003072	Hypercalcemia
Hypercalciuria	C0020438	HP:0002150	Hypercalciuria
Hypercholesterolaemia	C0020443	HP:0003124	Hypercholesterolemia
Hypereosinophilia	C0745091	HP:0001880	Eosinophilia
Hypergammaglobulinaemia	C0020455	HP:0010702	Hypergammaglobulinemia
Hyperglycaemia	C0020456	HP:0003074	Hyperglycemia
Hyperkalaemia	C0020461	HP:0002153	Hyperkalemia
Hyperkinesia	C0424295	HP:0002487	Hyperkinesis
Hyperlactacidaemia	C0795692	HP:0002151	Increased serum lactate
Hyperlipidaemia	C0020473	HP:0003077	Hyperlipidemia
Hypermagnesaemia	C0151714	HP:0002918	Hypermagnesemia
Hypermethioninaemia	C0268621	HP:0003235	Hypermethioninemia
Hypernatraemia	C0020488	HP:0003228	Hypernatremia
Hyperparathyroidism	C0020502	HP:0000843	Hyperparathyroidism
Hyperphagia	C0020505	HP:0002591	Polyphagia
Hyperphosphataemia	C0085681	HP:0002905	Hyperphosphatemia
Hyperprolactinaemia	C0020514	HP:0000870	Hyperprolactinemia
Hyperproteinaemia	C0267988	HP:0002152	Hyperproteinemia
Hyperreflexia	C0151889	HP:0001347	Hyperreflexia
Hypersomnia	C0917799	HP:0007200	Episodic hypersomnia
Hypersplenism	C0020532	HP:0001971	Hypersplenism
Hypertension	C0020538	HP:0000822	Hypertension
Hypertensive episode	C0520539	HP:0000875	Episodic hypertension
Hyperthermia	C1704628	HP:0001945	Fever
Hyperthermia malignant	C0024591	HP:0002047	Malignant hyperthermia
Hyperthyroidism	C0020550	HP:0000836	Hyperthyroidism
Hypertonia	C0026826	HP:0001276	Hypertonia
Hypertonic bladder	C0878773	HP:0005340	Spastic/hyperactive bladder
Hypertonicity	C0235396	HP:0001276	Hypertonia
Hypertriglyceridaemia	C0020557	HP:0002155	Hypertriglyceridemia
Hypertrophic cardiomyopathy	C0007194	HP:0001639	Hypertrophic cardiomyopathy
Hyperuricaemia	C0740394	HP:0002149	Hyperuricemia
Hyperuricosuria	C0948643	HP:0003149	Hyperuricosuria
Hyperventilation	C0020578	HP:0002883	Hyperventilation
Hypnagogic hallucination	C0233773	HP:0002519	Hypnagogic hallucinations
Hypoalbuminaemia	C0239981	HP:0003073	Hypoalbuminemia
Hypocalcaemia	C0020598	HP:0002901	Hypocalcemia
Hypocalcemic tetany	C0151940	HP:0003472	Hypocalcemic tetany
Hypochloraemia	C0085680	HP:0003113	Hypochloremia
Hypocholesterolaemia	C0151718	HP:0003146	Hypocholesterolemia
Hypochromic anaemia	C0002884	HP:0001931	Hypochromic anemia
Hypogammaglobulinaemia	C0086438	HP:0004315	Decreased IgG level
Hypogeusia	C0151934	HP:0000224	Decreased taste sensation
Hypoglycaemic coma	C0020617	HP:0001325	Hypoglycemic coma
Hypoglycaemic episode	C0745153	HP:0001988	Recurrent hypoglycemia
Hypoglycaemic seizure	C0877056	HP:0002173	Seizures, hypoglycemic
Hypohidrosis	C0020620	HP:0000966	Hypohidrosis
Hypokalaemia	C0020621	HP:0002900	Hypokalemia
Hypomagnesaemia	C0151723	HP:0002917	Hypomagnesemia
Hyponatraemia	C0020625	HP:0002902	Hyponatremia
Hyponatraemic	C0857122	HP:0002902	Hyponatremia
Hypoparathyroidism	C0020626	HP:0000829	Hypoparathyroidism
Hypophosphataemia	C0085682	HP:0008285	Transient hypophosphatemia
Hypoplasia enamel	C0011351	HP:0006297	Hypoplasia of dental enamel
Hypoplastic anaemia	C0178416	HP:0001908	Hypoplastic anemia
Hypoproteinaemia	C0020639	HP:0008360	Neonatal hypoproteinemia
Hyposmia	C0234260	HP:0010634	Total hyposmia
Hypospadias	C1691215	HP:0003244	Penile hypospadias
Hyposthenuria	C0232831	HP:0003158	Hyposthenuria
Hypotension	C0020649	HP:0002615	Hypotension
Hypotensive	C0857353	HP:0002615	Hypotension
Hypouricaemia	C0221333	HP:0003537	Hypouricemia
Ichthyosis acquired	C0263386	HP:0008064	Ichthyosiform abnormality of the skin
Idiopathic hypertrophic subaortic stenosis	C0700053	HP:0001691	Muscular subvalvular aortic stenosis
Idiopathic pneumonia syndrome	C1504431	HP:0002090	Pneumonia
Idiopathic thrombocytopenia	C0920163	HP:0001936	Idiopathic thrombocytopenia
Idiopathic thrombocytopenic purpura	C0043117	HP:0004829	idiopathic thrombocytopenic purpura
Ileus	C1258215	HP:0002595	Ileus
Ileus paralytic	C0030446	HP:0002590	Paralytic ileus
Immunodeficiency	C0021051	HP:0002721	Immunodeficiency
Immunoglobulin G low	C0239987	HP:0004315	Decreased IgG level
Immunoglobulins increased	C0151729	HP:0010702	Hypergammaglobulinemia
Increased appetite	C0232461	HP:0002591	Polyphagia
Increased tendency to bruise	C0423798	HP:0000978	Bruising susceptibility
Infantile genetic agranulocytosis	C1853118	HP:0005541	Congenital agranulocytosis
Infarction	C0021308	HP:0001658	Infarction
Infarction mesenteric	C0267406	HP:0005244	Gastrointestinal Infarction
Infection susceptibility increased	C0236171	HP:0002719	Recurrent infections
Infertility	C0021359	HP:0000789	Infertility
Infertility female	C0021361	HP:0008222	Female infertility
Infertility male	C0021364	HP:0003251	Male infertility
Inflammatory bowel disease	C0021390	HP:0002037	Inflammatory bowel disease
Inguinal hernia	C0019294	HP:0000023	Inguinal hernia
Insufficiency renal	C1565489	HP:0000083	Renal failure
Insulin resistance	C0021655	HP:0000855	Insulin resistance
Intention tremor	C0234376	HP:0002345	Action tremor
Intermittent claudication	C0021775	HP:0004417	Intermittent claudication
Intermittent fever	C0277799	HP:0001954	Fever, episodic
Interstitial lung disease	C0206062	HP:0006530	Interstitial pulmonary disease
Interstitial pneumonia	C0206061	HP:0006515	Interstitial pneumonitis
Intestinal haemorrhage	C0267373	HP:0002584	Intestinal bleeding
Intestinal infarction	C0241950	HP:0005244	Gastrointestinal infarction
Intra-uterine death	C0015927	HP:0003826	Stillbirth
Intracranial pressure increased	C0151740	HP:0002516	Increased intracranial pressure
Intraocular pressure increased	C0234708	HP:0007906	Increased intraocular pressure
Intussusception	C0021933	HP:0002576	Intussusception
Iridocyclitis	C0022073	HP:0001094	Iridocyclitis
Iritis	C0022081	HP:0001101	Iritis
Iron deficiency anaemia	C0162316	HP:0001891	Iron deficiency anemia
Irritability	C0022107	HP:0000737	Irritability
Ischaemic cerebral infarction	C1262005	HP:0002637	Cerebral ischemia
Ischaemic stroke	C0948008	HP:0002140	Ischemic stroke
Ischial neuralgia	C0549346	HP:0003489	Acute episodes of neuropathic symptoms
Jaundice	C0022346	HP:0000952	Jaundice
Jaundice cholestatic	C0022354	HP:0006575	Intrahepatic cholestasis with episodic jaundice
Jaundice neonatal	C0022353	HP:0006579	Prolonged neonatal jaundice
Keloid scar	C0022548	HP:0010562	Keloids
Keratitis	C0022568	HP:0000491	Keratitis
Keratoconjunctivitis	C0022573	HP:0001096	Keratoconjunctivitis
Keratoconjunctivitis sicca	C0022575	HP:0001097	Keratoconjunctivitis sicca
Ketoacidosis	C0220982	HP:0005974	Ketoacidosis, episodic
Ketonuria	C0162275	HP:0002919	Ketonuria
Ketosis	C0022638	HP:0001946	Ketosis
Klebsiella infection	C0022729	HP:0002742	Recurrent Klebsiella infections
Knee osteoarthritis	C0409959	HP:0005086	Knee osteoarthritis
Lacrimation decreased	C0235857	HP:0000633	Decreased lacrimation
Lacrimation increased	C0152227	HP:0009926	Increased lacrimation
Lactose intolerance	C0022951	HP:0004789	Lactose intolerance
Lenticular opacities	C1510497	HP:0000518	Cataract
Lethargy	C0023380	HP:0001254	Lethargy
Leukaemia	C0023418	HP:0001909	Leukemia
Leukocytosis	C0023518	HP:0001974	Leukocytosis
Leukoderma	C0162835	HP:0009719	Hypomelanotic macules
Leukoencephalopathy	C0270612	HP:0002352	Leukoencephalopathy
Leukonychia	C0240182	HP:0001820	Leukonychia
Leukopenia	C0023530	HP:0001882	Leukopenia
Leukoplakia oral	C0023532	HP:0002745	Oral leukoplakia
Light anaesthesia	C0475746	HP:0007328	Decreased pain sensation
Limb paresis	C0587246	HP:0003690	Limb muscle weakness
Lip oedema	C0541923	HP:0100695	Lipedema
Lipid metabolism disorder	C0154251	HP:0003119	Abnormality of lipid metabolism
Lipids increased	C0851043	HP:0003077	Hyperlipidemia
Lipodystrophy	C0023787	HP:0009125	Lipodystrophy
Lipohypertrophy	C1262113	HP:0009126	Increased adipose tissue
Livedo reticularis	C0085642	HP:0000965	Cutis marmorata
Liver carcinoma	C2239176	HP:0001402	Hepatocellular carcinoma
Liver fatty	C0015695	HP:0006555	Diffuse hepatic steatosis
Liver fatty deposition	C0151765	HP:0006561	Lipid accumulation in hepatocytes
Liver function test abnormal	C0151766	HP:0002910	Elevated hepatic transaminases
Lividity	C0332579	HP:0000980	Pallor
Loss of consciousness	C0041657	HP:0007185	Loss of consciousness
Low back pain	C0024031	HP:0003419	Low back pain
Low set ears	C0239234	HP:0000369	Low-set ears
Lymphadenitis	C0024205	HP:0002840	Lymphadenitis
Lymphadenopathy	C0497156	HP:0002716	Lymphadenopathy
Lymphocytic leukaemia	C0023448	HP:0005526	Lymphoid leukemia
Lymphoedema	C0024236	HP:0001004	lymphedema
Lymphoid interstitial pneumonia	C0264511	HP:0006527	Lymphoid interstitial pneumonia
Lymphoma	C0024299	HP:0002665	Lymphoma
Lymphopenia	C0024312	HP:0001888	Lymphopenia
Lymphoproliferative disorder	C0024314	HP:0005523	Lymphoproliferative disorder
Maculopathy	C0730362	HP:0001103	Abnormality of the macula
Malabsorption	C0024523	HP:0002024	Malabsorption
Malformation heart (NOS)	C0018798	HP:0002564	Cardiac malformation
Masked facies	C0424448	HP:0000298	Mask-like facies
Melaena	C0025222	HP:0002249	Melena
Memory impairment	C0233794	HP:0002354	Memory impairment
Meningitis	C0025289	HP:0001287	Meningitis
Meningocele	C1261470	HP:0002435	Meningocele
Menorrhagia	C0025323	HP:0000132	Menorrhagia
Menstruation irregular	C0156404	HP:0000858	Menstrual irregularities
Mental disability	C1306341	HP:0100543	Cognitive impairment
Mental disorder	C0004936	HP:0000708	Behavioural/Psychiatric Abnormality
Microangiopathic haemolytic anaemia	C0221021	HP:0001937	Microangiopathic hemolytic anemia
Microcephaly	C0025958	HP:0005484	Microcephaly, postnatal
Microcytic anaemia	C0085576	HP:0001935	Microcytic anemia
Microscopic hematuria	C0239937	HP:0002907	Microhematuria
Micturition urgency	C0085606	HP:0000012	Urinary urgency
Migraine	C0149931	HP:0002076	Migraine
Migraine with aura	C0154723	HP:0002077	Migraine with aura
Migraine without aura	C0338480	HP:0002083	Migraine without aura
Milia	C0345996	HP:0001056	Milia
Miosis	C0026205	HP:0000616	Miosis
Mitral valve incompetence	C0026266	HP:0001653	Mitral regurgitation
Mood swings	C0085633	HP:0000720	Mood Swings
Motor tic	C0751900	HP:0100034	Motor tics
Mouth haemorrhage	C0029163	HP:0000167	Oral bleeding
Mouth ulceration	C0149745	HP:0000155	Oral ulcers
Movement disorder	C0026650	HP:0100022	Abnormality of movement
Mucocutaneous candidiasis	C0006848	HP:0002728	Chronic mucocutaneous candidiasis
Multiple hereditary exostosis	C0015306	HP:0005655	Multiple exostoses, esp digits
Multiple myeloma	C0026764	HP:0006775	Multiple myeloma
Muscle contractions involuntary	C0235086	HP:0004305	Involuntary muscle contractions
Muscle fatigue	C0242979	HP:0003750	Increased muscle fatiguability
Muscle rigidity	C0026837	HP:0002063	Rigidity
Muscle spasms	C0037763	HP:0003739	Myoclonic spasms
Muscle tone flaccid	C0026825	HP:0010547	Muscle flaccidity
Muscular weakness	C0151786	HP:0001324	Muscle weakness
Musculoskeletal chest pain	C0476280	HP:0006649	Costochondral pain
Mutism	C0026884	HP:0002300	Mutism
Myalgia	C0231528	HP:0003326	Myalgia
Myasthenia	C0947912	HP:0001324	Muscle weakness
Myasthenia gravis	C0026896	HP:0008979	Muscle weakness, severe
Myasthenic syndrome	C0549225	HP:0001324	Muscle weakness
Myelodysplastic syndrome	C0026986	HP:0006730	Myelodysplastic syndrome
Myeloproliferative disorder	C0027022	HP:0005547	Myeloproliferative disorder
Myocardial infarction	C0027051	HP:0001658	Myocardial infarction
Myocardial necrosis	C1442837	HP:0001700	Myocardial necrosis
Myoclonic epilepsy	C0014550	HP:0002123	Myoclonic seizures
Myoclonus	C0027066	HP:0010531	Spinal myoclonus
Myopathy	C0026848	HP:0003198	Myopathy
Myopia	C0027092	HP:0008012	Myopia, congenital
Myositis	C0027121	HP:0009071	Inflammatory myopathy
Myxoedema	C0027145	HP:0000969	Edema
Nail dystrophy	C0221260	HP:0008404	Nail dystrophy
Nail thinning	C0423823	HP:0001814	Thin, deep-set nails
Nasal oedema	C0475765	HP:0000969	Edema
Nasal polyps	C0027430	HP:0000462	Nasal polyps
Nausea	C0027497	HP:0002018	Nausea
Neoplasm skin	C0037286	HP:0008069	Neoplasm of the skin
Nephritis interstitial	C0027707	HP:0008654	Tubulointerstitial nephropathy
Nephrocalcinosis	C0027709	HP:0000121	Nephrocalcinosis
Nephrogenic diabetes insipidus	C0162283	HP:0009806	Nephrogenic diabetes insipidus
Nephrosclerosis	C0027719	HP:0009741	Nephrosclerosis
Nephrosis	C0027720	HP:0000100	Nephrotic syndrome
Nephrotic syndrome	C0027726	HP:0000100	Nephrotic syndrome
Nervous system disorder	C0027765	HP:0000707	Abnormality of the nervous system
Neuralgia	C0027796	HP:0003489	Acute episodes of neuropathic symptoms
Neurofibromatosis	C0162678	HP:0001067	Neurofibromas
Neurogenic bladder	C0005697	HP:0000011	Neurogenic bladder
Neuropathy peripheral	C0031117	HP:0009830	Peripheral neuropathy
Neutropenia	C0027947	HP:0001875	Neutropenia
Night blindness	C0028077	HP:0000662	Night blindness
Nipple disorder	C0405479	HP:0004404	Abnormality of the nipple
Nocturia	C0028734	HP:0000017	Nocturia
Nonketotic hyperglycinaemia	C0751748	HP:0008288	Nonketotic hyperglycinemia
Normal pressure hydrocephalus	C0020258	HP:0002343	Normal pressure hydrocephalus
Normochromic anemia	C0235983	HP:0001895	Normochromic anemia
Obesity	C0028754	HP:0001513	Obesity
Obsessive-compulsive disorder	C0028768	HP:0000722	Obsessive-compulsive disorder
Obstipation	C0221152	HP:0002019	Constipation
Obstructive sleep apnea syndrome	C0520679	HP:0002870	Obstructive sleep apnea
Oculogyric crisis	C0085637	HP:0010553	Oculogyric crisis
Oedema	C0013604	HP:0000969	Edema
Oesophageal achalasia	C0014848	HP:0002571	Achalasia
Oesophageal obstruction	C0239296	HP:0005240	Esophageal obstruction
Oesophageal perforation	C0014860	HP:0005203	Spontaneous esophageal perforation
Oesophageal stenosis	C0014866	HP:0010450	Esophageal stenosis
Oesophageal ulcer	C0151970	HP:0004791	Esophageal ulceration
Oesophagitis	C0014868	HP:0100633	Esophagitis
Oligohydramnios	C0079924	HP:0001562	Oligohydramnios
Oligomenorrhoea	C0028949	HP:0000876	Oligomenorrhea
Oligospermia	C0028960	HP:0000798	Oligospermia
Omphalocele	C0795690	HP:0001539	Omphalocele
Onychoclasis	C0546956	HP:0001808	Fragile nails
Opisthotonus	C0151818	HP:0002179	Opisthotonus
Opportunistic infection	C0029118	HP:0005390	Frequent bacterial, viral, and opportunistic infections
Optic atrophy	C0029124	HP:0007855	Optic atrophy, congenital
Optic neuritis	C0029134	HP:0100653	Optic neuritis
Oral candidiasis	C0006849	HP:0009098	Chronic oral candidiasis
Organising pneumonia	C0264383	HP:0002090	Pneumonia
Orofacial dyskinesia	C0152115	HP:0002310	Orofacial dyskinesia
Orthostatic hypotension	C0020651	HP:0001278	Orthostatic hypotension
Osteomalacia	C0029442	HP:0002749	Osteomalacia
Osteonecrosis	C0029445	HP:0010885	Aseptic necrosis
Osteopenia	C0029453	HP:0000938	Osteopenia
Osteosarcoma	C0029463	HP:0002669	Osteosarcoma
Osteosclerosis	C0029464	HP:0011001	Increased bone mineral density
Otitis media acute	C0271429	HP:0000371	Acute otitis media
Otitis media chronic	C0271441	HP:0000389	Chronic otitis media
Ovarian cyst	C0029927	HP:0000138	Ovarian cysts
Ovarian failure	C0747102	HP:0001587	Primary ovarian failure
Pain in jaw	C0236000	HP:0200023	Mandibular pain
Palpitations	C0030252	HP:0001962	Palpitations
Pancreatic pseudocyst	C0030299	HP:0005206	Pancreatic pseudocysts
Pancreatitis	C0030305	HP:0001733	Pancreatitis
Pancreatitis acute	C0001339	HP:0001735	Acute pancreatitis
Pancreatitis chronic	C0149521	HP:0006280	Chronic pancreatitis
Pancytopenia	C0030312	HP:0001876	Pancytopenia
Papilloedema	C0030353	HP:0001085	Papilledema
Paraesthesia	C0030554	HP:0003401	Paresthesia
Paraplegia	C0030486	HP:0010550	Paraplegia
Parkinsonism	C0242422	HP:0001300	Parkinsonism
Paronychia	C0030578	HP:0001818	Paronychia
Paroxysmal atrial tachycardia	C0030587	HP:0006671	Paroxysmal atrial tachycardia
Paroxysmal nocturnal haemoglobinuria	C0024790	HP:0004818	paroxysmal nocturnal hemoglobinuria
Paroxysmal ventricular tachycardia	C0030591	HP:0004751	Paroxysmal ventricular tachycardia
Partial seizures	C0751495	HP:0007359	Partial seizures
Patent ductus arteriosus	C0013274	HP:0001643	Patent ductus arteriosus
Peptic ulcer	C0030920	HP:0004398	Peptic ulcer
Peptic ulcer haemorrhage	C0030922	HP:0002584	Intestinal bleeding
Peptic ulcer perforation	C0030925	HP:0002584	Intestinal bleeding
Pericardial effusion	C0031039	HP:0001698	Pericardial effusion
Pericarditis	C0031046	HP:0001701	Pericarditis
Pericarditis constrictive	C0031048	HP:0002563	Constrictive pericarditis
Periodontitis	C0031099	HP:0000704	Periodontitis
Peripheral arterial disease	C1704436	HP:0004950	Peripheral arterial disease
Peripheral neuroepithelioma	C0684337	HP:0006717	Peripheral neuroepithelioma
Peripheral vascular disorder	C0085096	HP:0005299	Premature peripheral vascular disease
Peritonitis	C0031154	HP:0002586	Peritonitis
Periventricular leukomalacia	C0023529	HP:0006970	Periventricular leukomalacia
Personality change	C0240735	HP:0000751	Personality changes
Petechiae	C0031256	HP:0000967	Petechiae
Petit mal epilepsy	C0014553	HP:0002121	Absence seizures
Phaeochromocytoma	C0031511	HP:0006748	Adrenal pheochromocytoma
Pharyngeal oedema	C0236024	HP:0000969	Edema
Phimosis	C0345326	HP:0001741	Phimosis
Phonophobia	C0751466	HP:0002183	Phonophobia
Photophobia	C0085636	HP:0000613	Photophobia
Photosensitivity allergic reaction	C0236106	HP:0000992	Cutaneous photosensitivity
Pilonidal cyst	C0031925	HP:0010768	Pilonidal cyst
Pituitary adenoma	C0032000	HP:0002893	Pituitary adenoma
Plantar warts	C0042548	HP:0200043	Verrucae
Platelet aggregation abnormal	C0541767	HP:0008177	Abnormal platelet aggregation in response to various agents
Pleural effusion	C0032227	HP:0002202	Pleural effusion
Pleurisy	C0032231	HP:0002102	Pleuritis
Pneumonia recurrent	C0694550	HP:0006532	Recurrent pneumonia
Pneumothorax spontaneous	C0149781	HP:0004876	spontaneous neonatal pneumothorax
Poikilocytosis	C0221281	HP:0004447	Poikilocytosis
Polyarthritis	C0162323	HP:0005764	Polyarticular arthritis
Polycystic kidney	C0022680	HP:0008673	Infantile polycystic kidneys
Polycystic ovaries	C0032460	HP:0000147	Polycystic ovaries
Polycythaemia	C0032461	HP:0001901	Polycythemia
Polydipsia	C0085602	HP:0001959	Polydipsia
Polyhydramnios	C0020224	HP:0001561	Polyhydramnios
Polyneuropathy	C0152025	HP:0001271	Polyneuropathy
Polyuria	C0032617	HP:0000103	Polyuria
Portal hypertension	C0020541	HP:0001409	Portal hypertension
Posterior subcapsular cataract	C0858617	HP:0007787	Posterior subcapsular cataract
Postoperative hemorrhage	C0032788	HP:0004846	Severe protracted bleeding after surgery
Posture abnormal	C0231471	HP:0002533	Abnormal posturing
Potassium abnormal NOS	C0549635	HP:0011042	Abnormality of potassium homeostasis
Potassium deficiency	C0032827	HP:0002900	Hypokalemia
Potassium increased	C0856882	HP:0002153	Hyperkalemia
Potassium low	C0860866	HP:0002900	Hypokalemia
Potter's syndrome	C1609433	HP:0002009	Potter facies
Priapism	C0033117	HP:0200023	Priapism
Primary hypothyroidism	C0700502	HP:0000832	Primary hypothyroidism
Progressive renal failure	C0748318	HP:0000106	Progressive renal insufficiency
Prolactinoma	C0033375	HP:0006767	Prolactin-secreting pituitary adenoma
Prostatitis	C0033581	HP:0000024	Prostatitis
Proteinuria	C0033687	HP:0000093	Proteinuria
Prothrombin level increased	C0151872	HP:0003645	Prolonged partial thromboplastin time
Protrusion tongue	C0241442	HP:0000158	Macroglossia
Pruritus	C0033774	HP:0000989	Pruritus
Psoriasis	C0033860	HP:0003765	Psoriasis
Psychomotor retardation	C0424230	HP:0001270	Motor delay
Psychotic disorder	C0033975	HP:0000709	Psychosis
Psychotic episode	C0338614	HP:0000725	Psychotic episodes
PTT prolonged	C0240671	HP:0003645	Prolonged partial thromboplastin time
Pulmonary embolism	C0034065	HP:0002204	Pulmonary embolism
Pulmonary fibrosis	C0034069	HP:0002206	Pulmonary fibrosis
Pulmonary hypertension	C0020542	HP:0002092	Pulmonary hypertension
Pulmonary hypoplasia	C0265783	HP:0002089	Pulmonary hypoplasia
Pulmonary oedema	C0034063	HP:0100598	Pulmonary edema
Pupils unequal	C0003079	HP:0009916	Anisocoria
Purpura	C0034150	HP:0000979	Purpura
Pyloric stenosis	C0034194	HP:0002021	Pyloric stenosis
Pyoderma	C0034212	HP:0000999	Pyoderma
Quadriparesis	C0270790	HP:0002273	Tetraparesis
Quadriplegia	C0034372	HP:0002445	Tetraplegia
Raised liver function tests	C0877359	HP:0002910	Elevated hepatic transaminases
Rash	C0015230	HP:0000988	skin rash
Rectal haemorrhage	C0267596	HP:0002573	Hematochezia
Rectal polyp	C0034887	HP:0100897	Multiple rectal polyps
Rectal prolapse	C0034888	HP:0002035	Rectal prolapse
Recurrent urinary tract infection	C0262655	HP:0000010	Recurrent urinary tract infections
Red blood cell abnormality	C0391870	HP:0001877	Abnormality of erythrocytes
Red blood cell sedimentation rate increased	C0151632	HP:0003565	Elevated erythrocyte sedimentation rate
Refractory anaemia	C0002893	HP:0005505	Refractory anemia
Renal artery stenosis	C0035067	HP:0001920	Renal artery stenosis
Renal cancer	C0740457	HP:0009726	Renal neoplasm
Renal cyst	C0022679	HP:0000107	Renal cysts
Renal failure	C0035078	HP:0000083	Renal failure
Renal failure acute	C0022660	HP:0001919	Acute renal failure
Renal failure chronic	C0022661	HP:0000101	Chronic renal failure
Renal impairment	C0341697	HP:0000082	Abnormality of renal physiology
Renal insufficiency aggravated	C1536070	HP:0000083	Renal failure
Renal neoplasm	C0022665	HP:0009726	Renal neoplasm
Renal tubular acidosis	C0001126	HP:0008341	Renal tubular acidosis, type I
Respiration abnormal	C1260922	HP:0002795	Functional respiratory abnormality
Respiratory acidosis	C0001127	HP:0005972	Respiratory acidosis
Respiratory alkalosis	C0002064	HP:0001950	Respiratory alkalosis
Respiratory arrest	C0162297	HP:0005943	Respiratory arrest
Respiratory failure	C1145670	HP:0004877	respiratory failure in infancy
Respiratory insufficiency	C0035229	HP:0002093	Respiratory insufficiency
Respiratory tract infection	C0035243	HP:0002873	Recurrent upper and lower respiratory tract infections
Reticulocyte count increased	C0853718	HP:0001923	Reticulocytosis
Reticulocytosis	C0206160	HP:0001923	Reticulocytosis
Retinal atrophy	C0521694	HP:0001105	Retinal atrophy
Retinal detachment	C0035305	HP:0007864	Congenital retinal detachment
Retinal haemorrhage	C0035317	HP:0000573	Retinal hemorrhage
Retinitis pigmentosa	C0035334	HP:0000510	Retinitis pigmentosa
Retroperitoneal fibrosis	C0035357	HP:0005200	Retroperitoneal fibrosis
Reye's syndrome	C0035400	HP:0006582	Reye syndrome-like episodes
Rheumatoid arthritis	C0003873	HP:0005681	Rheumatoid arthritis, juvenile
Rhinitis allergic	C2607914	HP:0003193	Allergic rhinitis
Salivary gland disorder	C0036093	HP:0010286	Abnormality of the salivary glands
Salivary hypersecretion	C0037036	HP:0003781	Excessive salivation
Sarcoma	C1261473	HP:0100242	Sarcoma
Seborrhoeic dermatitis	C0036508	HP:0001051	Seborrheic dermatitis
Seizures	C0036572	HP:0001250	Seizures
Serum albumin decreased	C0580493	HP:0003073	Hypoalbuminemia
Serum bilirubin increased	C0859062	HP:0002904	Hyperbilirubinemia
Serum calcium decreased	C0595882	HP:0002901	Hypocalcemia
Serum calcium increased	C0595928	HP:0003072	Hypercalcemia
Serum ferritin increased	C0241013	HP:0003281	Increased serum ferritin
Serum iron increased	C0151900	HP:0003452	Increased serum iron
Serum triglycerides increased	C0813230	HP:0002155	Hypertriglyceridemia
Simple partial seizures	C0234974	HP:0002349	Focal seizures without impairment of consciousness or awareness
Single umbilical artery	C1384670	HP:0001195	Single umbilical artery
Sinus bradycardia	C0085610	HP:0001688	Sinus bradycardia
Sinusitis	C0037199	HP:0000246	Sinusitis
Skin exfoliation	C0237849	HP:0007549	Desquamation of skin soon after birth
Skin thickening	C0241165	HP:0001072	Thickened skin
Skin thinness	C0423757	HP:0000963	Thin skin
Skin ulcer	C0037299	HP:0200042	Skin ulcer
Sleep apnoea syndrome	C0037315	HP:0010535	Sleep apnea
Sleep disorder	C0851578	HP:0002360	Sleep disturbances
Sleep disturbance	C0037317	HP:0002360	Sleep disturbances
Slipped femoral capital epiphysis	C0149887	HP:0006461	Proximal femoral epiphysiolysis
Spina bifida	C0080178	HP:0010301	Spinal dysraphism
Spinal cord compression	C0037926	HP:0002176	Spinal cord compression
Spinal cord disorder	C0037928	HP:0002196	Myelopathy
Splenomegaly	C0038002	HP:0001744	Splenomegaly
Status epilepticus	C0038220	HP:0002133	Status epilepticus
Steatorrhoea	C0038238	HP:0002570	Steatorrhea
Stillbirth	C0595939	HP:0001410	Stillbirth
Stomatitis	C0038362	HP:0010280	Stomatitis
Strabismus	C0038379	HP:0000486	Strabismus
Stridor	C0038450	HP:0010307	Stridor
Subarachnoid haemorrhage	C0038525	HP:0002138	Subarachnoid hemorrhage
Subdural haematoma	C0018946	HP:0100309	Subdural hemorrhage
Sudden cardiac death	C0085298	HP:0001645	Sudden cardiac death
Supernumerary nipple	C0266011	HP:0002558	Supernumerary nipples
Sweating	C0038990	HP:0000975	Hyperhidrosis
Sweating increased	C0700590	HP:0000975	Hyperhidrosis
Swelling of eyelid	C0560024	HP:0100540	Palpebral edema
Syncope	C0039070	HP:0001279	Syncope
Synovitis	C0039103	HP:0100769	Synovitis
Systemic lupus erythematosus	C0024141	HP:0002725	Systemic lupus erythematosus
Systolic hypertension	C0221155	HP:0004421	Elevated systolic blood pressure
Tachycardia	C0039231	HP:0001649	Tachycardia
Talipes	C1301937	HP:0001883	Talipes
Tarry stools	C0474585	HP:0002249	Melena
Telangiectasis facial	C0858684	HP:0007380	Facial telangiectatic vessels
Testicular atrophy	C0156312	HP:0000029	Testicular atrophy
Tetany	C0039621	HP:0001281	Tetany
Thalassaemia	C0039730	HP:0005560	Thalassemia
Thinking abnormal	C0233632	HP:0100543	Cognitive impairment
Thrombocytopenia	C0040034	HP:0001873	Thrombocytopenia
Thrombocytosis	C0836924	HP:0001894	Thrombocytosis
Thromboembolic event	C0857496	HP:0001907	Thromboembolism
Thromboembolism	C0040038	HP:0004831	recurrent thromboembolic disease
Thrombophlebitis	C0040046	HP:0004418	Thrombophlebitis
Thrombophlebitis superficial	C1510431	HP:0002638	Superficial thrombophlebitis
Thyroid adenoma	C0151468	HP:0000854	Thyroid adenoma
Thyroid carcinoma	C0549473	HP:0002890	Thyroid carcinoma
Thyroid disorder	C0040128	HP:0000820	Abnormality of the thyroid gland
Tight foreskin	C0031538	HP:0001741	Phimosis
Tingling sensation	C2242996	HP:0003401	Paresthesia
Tinnitus	C0040264	HP:0000360	Tinnitus
Tooth impacted	C0040456	HP:0001571	Multiple impacted teeth
Tooth infection	C0877046	HP:0000670	Carious teeth
Tooth malformation	C0040427	HP:0006482	Abnormality of dental morphology
Torsade de pointes	C0040479	HP:0001664	Torsade de pointes
Torticollis	C0040485	HP:0005988	Congenital muscular torticollis
Tracheo-oesophageal fistula	C0040588	HP:0002575	Tracheoesophageal fistula
Transaminases increased	C0438717	HP:0002910	Elevated transaminases
Transient global amnesia	C0338591	HP:0010534	Transient global amnesia
Transient ischaemic attack	C0007787	HP:0002326	Transient ischemic attack
Tremor of hands	C0239842	HP:0002378	Hand tremor
Tremulousness	C0542247	HP:0001337	Tremor
Trigeminal neuralgia	C0040997	HP:0100661	Trigeminal neuralgia
Trismus	C0041105	HP:0000211	Trismus
Tropical spastic paresis	C0030481	HP:0007191	Tropical spastic paraparesis
Tubulointerstitial nephritis	C0041349	HP:0001970	Tubulointerstitial nephritis
Type 1 diabetes mellitus	C0011854	HP:0004904	Insulin-dependent maturity-onset diabetes of the young
Umbilical hernia	C0019322	HP:0001537	Umbilical hernia
Unspecified disorder of autonomic nervous system	C1145628	HP:0002270	Abnormality of the autonomous nervous system
Unspecified disorder of intestine	C0021831	HP:0002628	Enteropathy
Upper airway obstruction	C0740852	HP:0002781	Upper airway obstruction
Upper limb oedema	C0522035	HP:0010742	Edema of the upper limbs
Ureteric obstruction	C0041956	HP:0006000	Ureteral obstruction
Urethral obstruction	C0041972	HP:0000796	Urethral obstruction
Urge incontinence	C0150045	HP:0000012	Urinary urgency
Urinary hesitation	C0152032	HP:0000019	Urinary hesitancy
Urinary incontinence	C0042024	HP:0000020	Urinary incontinence
Urinary retention	C0080274	HP:0000016	Urinary retention
Urinary tract infection	C0042029	HP:0000094	Urinary tract infections
Urticaria	C0042109	HP:0001025	Urticaria
Uterine leiomyoma	C0042133	HP:0000131	Uterine leiomyoma
Uterine neoplasm	C0042138	HP:0010784	Uterine neoplasm
Uveitis	C0042164	HP:0000554	Uveitis
Vaginal neoplasm	C0042258	HP:0100650	Vaginal neoplasm
Varices oesophageal	C0014867	HP:0002040	Esophageal varices
Vascular calcification	C0342649	HP:0004934	Vascular calcifications
Vascular resistance pulmonary increased	C1867423	HP:0005317	Increased pulmonary vascular resistance
Vasculitis	C0042384	HP:0002633	Vasculitis
Vasculitis necrotising	C1318520	HP:0002633	Vasculitis
Venous insufficiency	C0042485	HP:0005293	Venous insufficiency
Ventricular arrhythmia	C0085612	HP:0004308	Ventricular arrhythmia
Ventricular fibrillation	C0042510	HP:0001663	Ventricular fibrillation
Ventricular hypertrophy	C0340279	HP:0001714	Ventricular hypertrophy
Ventricular septal defect	C0018818	HP:0010438	Abnormality of the ventricular septum
Ventricular tachycardia	C0042514	HP:0004756	Ventricular tachycardia
Vertical talus	C0240912	HP:0001838	Vertical talus
Vertigo	C0042571	HP:0002321	Vertigo
Vesicoureteric reflux	C0042580	HP:0000076	Vesicoureteral reflux
Vestibular disorder	C0042594	HP:0001751	Vestibular dysfunction
Violent	C0242151	HP:0008760	Violent behavior
Violent behavior	C0424323	HP:0008760	Violent behavior
Viral infection	C0042769	HP:0005364	Severe viral infections
Vision blurred	C0344232	HP:0000622	Blurred vision
Visual disturbance	C0547030	HP:0000504	Abnormality of vision
Visual impairment	C0042798	HP:0000505	Impaired vision
Vitamin B12 deficiency	C0042847	HP:0100502	Vitamin B12 deficiency
Vitamin B6 deficiency	C0936215	HP:0008326	Vitamin B6 deficiency
Vitamin D deficiency	C0042870	HP:0100513	Vitamin D deficiency
Vitiligo	C0042900	HP:0001045	Vitiligo
Vitreous detachment	C0042907	HP:0001489	Vitreous detachment
Vitreous haemorrhage	C0042909	HP:0007902	Vitreous hemorrhage
Vocal cord paralysis	C0042928	HP:0001605	Vocal cord paralysis
Vocal cord paresis	C0751576	HP:0001604	Vocal cord paresis
Vocal tic	C0751901	HP:0100035	Phonic tics
Vomiting	C0042963	HP:0002013	Vomiting
WBC abnormal NOS	C0152009	HP:0008264	Leukocyte granulation abnormality
Weakness	C1883552	HP:0001324	Muscle weakness
Weight decreased	C0043096	HP:0004325	Decreased body weight
Weight fluctuation	C0241729	HP:0004323	Abnormality of body weight
Weight increased	C0043094	HP:0004324	Increased body weight
White blood cell count abnormal	C0580531	HP:0001881	Abnormality of leukocytes
White blood cell count decreased	C0750394	HP:0001882	Leukopenia
White blood cell count increased	C0750426	HP:0001974	Leukocytosis
White blood cell count low	C0948695	HP:0001882	Leukopenia
White blood cell disorder	C0023510	HP:0001881	Abnormality of leukocytes
Xanthomatosis	C0043325	HP:0000991	Xanthomatosis
Xerophthalmia	C0043349	HP:0001097	Keratoconjunctivitis sicca
Xerosis	C0259817	HP:0000958	Dry skin
Zollinger-Ellison syndrome	C0043515	HP:0002044	Zollinger-Ellison syndrome
